# Supplementary material for: Observational study to characterise 24-hour COPD symptoms and their relationship with patient-reported outcomes: results from the ASSESS study
Source: Springer Nature journal article supplement (doi:10.1186/s12931-014-0122-1), 2014-10-20
Supplement: MOESM1 [file 9759480]

**Title:** ASSESS study investigators

DENMARK: N Godtfredsen, Bispebjerg hospital, København NV; M Jensen, Regionhospitalet Viborg, Viborg; C Johnsen, Roskilde Hospital, Roskilde; C Nielsen, Aalborg Sygehus, Aalborg; P Tønnesen, Gentofte Hospital, Hellerup; FRANCE: A Bernardy, Polyclinique Cote basque Sud / Centre médical Arnasa, St Jean De Luz; P Burgel, Hôpital Cochin, Paris; D Caillaud, Hôpital Gabriel Montpied, Clermont-Ferrand; J Chavaillon, Centre Hospitalier d'Antibes Juan les Pins, Juan Les Pins; C Chouaid, Hôpital Saint Antoine, Paris; G Devouassoux, Hôpital de la Croix-Rousse, Lyon; D Lejay, Hôtel Dieu, Vieux Condé; D Piperno, Centre Medical P.A.R.O.T., Lyon; N Roche, Cochin Hospital, Paris; G Thabut, Hôpital Bichat Claude Bernard, Paris; S Verdier, Centre de Pneumologie, Perpignan;

GERMANY: G Bourgeois , MVZ Dachau, Dachau; J Feimer , Praxis Dr. Feimer Pneumologie, Muenchen; C Franke , Facharztzentrum üBAG Sonneberg-Coburg, Sonneberg; C Geßner , Fachärzte für Innere Medizin und Bronchialheilkunde, Leipzig, Leipzig; T Ginko, Practice Dr. Ginko, Bonn; A Hellmann, Practice Dr. Hellman, Augsburg; F Herth, Thoraxklinik am Universitätsklinikum Heidelberg, Heidelberg; P Heymer, Klinische Forschung Dresden GmbH, Dresden; M Jandl, Hamburger Institut für Therapieforschung GmbH, Hamburg; A Linnhoff, Research Center for Medical studies (RCMS), Berlin; H Sudhoff, Lungenarzt Praxis Tegel, Berlin; C Vogelmeier, Klinik für Pneumologie at Universitätsklinikum Gießen und Marburg GmbH, Marburg; M Weber, Lungenpraxis Starnberg, Starnberg; T Welte, Med Hochschule Hannover, Hannover; H Worth, Klinikum Fürth, Fürth; ITALY: R, Antonelli-Incalzi, Policlinico Universitario Campus Biomedico, Rome; F Braido, Università degli Studi di Genova, A.O.U. S.Martino, Genova; M Carone, Istituto Scientifico di Riabilitazione di Cassano delle Murge, Cassano delle Murge; F De Benedetto, Ospedale Policlinico Clinicizzato SS. Annunziata, Chieti Scalo; M Delucchi, Ospedale Civile di Saluzzo, Saluzzo; S Nardini, Ospedale di Vittorio Veneto-

ULS 7- Regione Veneto, Vitt. Veneto; A Pesci, Univ. degli Studi di Milano-Bicocca.  
Azienda Ospedaliera S.Gerardo, Monza; M Pistolesi, Ospedale Careggi di Firenze, Firenze;  
E Sabato, ASL Brindisi -P.O. "N. Melli" San Pietro Vernotico, San Pietro Vernotico;  
C Tantucci, University of Brescia - Spedali Civili di Brescia, Brescia; SPAIN: R Agüero,  
Hospital Marques de Valdecilla, Santander; E Balcells, Hospital del Mar, Barcelona;  
P Benavides, Hospital Universitario 12 de Octubre, Madrid; P De Lucas, Hospital Gregorio  
Marañón, Madrid; J Ferrer Sancho, Hospital Vall d'Hebron, Barcelona; J Gómez Seco,  
Hospital Universitario Fundación Jiménez Díaz, Madrid; J Hueto Pérez, Hospital Virgen del  
Camino, Pamplona; J Izquierdo Alonso, Hospital Universitario de Guadalajara, Guadalajara;  
P Marin, Hospital Cruces, Barakaldo; A Marin, Hospital Germans Trias i Pujol, Badalona;  
M Miravittles, Hospital Vall Hebrón, Barcelona; E Monsó, Hospital Parc Taulí, Sabadell;  
J Sauleda, Hospital Universitario Son Espases, Palma de Mallorca; J Soler Cataluña, Hospital  
General de Requena, Requena; L Valdés Cuadrado, Hospital Universitario de Santiago,  
Santiago de Compostela; SWEDEN: D Curiac, Me3+ Clinical Trials, Göteborg;  
A Ekberg-Jansson, Angered Närsjukhus, Angered; A Lindberg, Sunderby Hospital, Luleå;  
C-G Löfdahl, Lund University Hospital, Lund; M Sköld, Karolinska University Hospital in  
Solna, Stockholm; A Sloma, Värmdö Vårdcentral, Gustavsberg;  
THE NETHERLANDS: G-J Braunstahl, St. Franciscus Gasthuis, Rotterdam; M Deenstra,  
Flevoziekenhuis, Almere; R Djamin, Amphia Ziekenhuis, Breda; K Liesker, Tergooi  
Ziekenhuizen, Blaricum; C Melissant, Spaarne Ziekenhuis, Hoofddorp; T Molen, University  
of Groningen, Groningen; G Staaks, Meander Medisch Centrum, Amersfoort; P van Spiegel,  
Slotervaartziekenhuis, Amsterdam; UK: S Elamin, Nork, Bansted; D Halpin, Royal Devon  
and Exeter Hospital, Exeter; J Haughney, Glasgow Clinical Research Facility, Tennent  
Institute, Glasgow; L McGarvey, Belfast City Hospital, Belfast; A Mehta, Fairfield Surgery,  
Bookham; J Morjaria, Hull & East Yorkshire Hospitals NHS Trust, Cottingham; P Pearson,

Loncroft, Bansted; D Price, Research in Real Life Ltd, Cambridge; J Quint, University of London NHS Trust, London; C Roberts, Thorkhill Surgery, Thames Ditton; T Rogers, Doncaster Royal Infirmary, Doncaster; I Smith, Papworth Hospital NHS Foundation Trust, Cambridge; N Stevenson, Wirral University Teaching Hospital NHS Foundation Trust, Upton; W Wedzicha, Royal Free Hospital, London; A Wilson, Norfolk & Norwich University Hospitals NHS Foundation Trust, Norwich
