# Supplementary material for: Observational study to characterise 24-hour COPD symptoms and their relationship with patient-reported outcomes: results from the ASSESS study
Source: Springer Nature journal article supplement (doi:10.1186/s12931-014-0122-1), 2014-10-20
Supplement: MOESM2 [file 9759480]

**Table.** Country approval authorities

| <b>Country</b>  | <b>Approval authority</b>                                                                                                                                                                           |
|-----------------|-----------------------------------------------------------------------------------------------------------------------------------------------------------------------------------------------------|
| Denmark         | Danish Medicines Agency, Copenhagen, Denmark<br>Koncern Organisation og Personale – Region Hovestaden, Hillerød, Denmark                                                                            |
| France          | Conseil National de l’Ordre des Médecins (CNOM), Paris, France<br>Comité consultatif sur le traitement de l’information en matière de recherché dans le domaine de la santé (CCTIRS), Paris, France |
| Germany         | Freiburger Ethik Kommission International (FEKI), Freiburg in Breisgau, Germany                                                                                                                     |
| Italy           | Comitato Etico of the Università Degli Studi “G. D’Annunzio”, Chieti, Italy                                                                                                                         |
| The Netherlands | Centrale Commissie Mensgebonden Onderzoek (CCMO), Den Haag, The Netherlands                                                                                                                         |
| Spain           | Agencia española de medicamentos y productos sanitarios, Madrid, Spain<br>Comité Ético de Investigación Clínica, Hospital Clínic de Barcelona, Barcelona, Spain                                     |
| Sweden          | Regionala Etikprövningsnämnden, Lund, Sweden                                                                                                                                                        |
| UK              | National Research Ethics Service (NRES) Committee Yorkshire & The Humber – Leeds West, Jarrow, UK<br>Papworth Hospital Research and Development Unit (R&D Unit), Cambridge, UK                      |
