# Supplementary material for: Observational study to characterise 24-hour COPD symptoms and their relationship with patient-reported outcomes: results from the ASSESS study
Source: Springer Nature journal article supplement (doi:10.1186/s12931-014-0122-1), 2014-10-20
Supplement: MOESM3 [file 9759480]

**Figure.** (A) Anxiety and (B) depression according to each combination of 24-hour COPD symptoms in patients without anxiety/depression

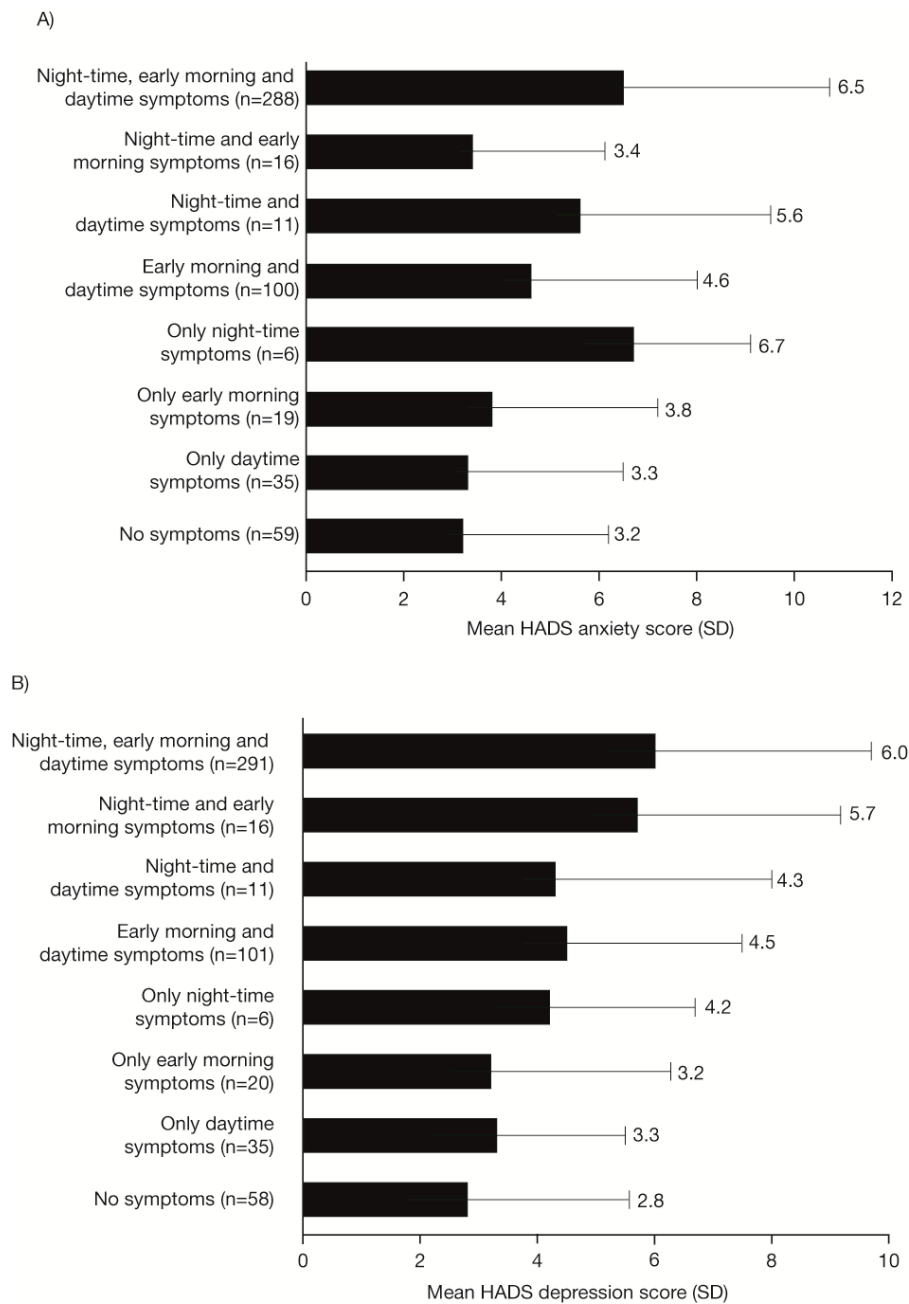

n=patients with available data for each outcome

Data are reported as mean  $\pm$  SD

HADS, Hospital Anxiety and Depression Scale; SD, standard deviation
